# Supplementary material for: An air and moisture tolerant iminotrihydroquinoline-ruthenium(ii) catalyst for the transfer hydrogenation of ketones
Source: Royal Society of Chemistry journal article supplement (doi:10.1039/c8dt01919c), 2018-01-01
Supplement: c8dt01919c1.pdf [file c8dt01919c1.pdf]

## Supporting Information for

### **An air and moisture tolerant iminotrihydroquinoline-ruthenium(II) catalyst for the transfer hydrogenation of ketones**

Jiaoyan Li,<sup>a,#</sup> Yingmiao Ma,<sup>a,#</sup> Zheng Wang,<sup>a,b,c,#</sup> Qingbin Liu,<sup>\*, a</sup> Gregory A. Solan,<sup>\*, b,d</sup> Yanping Ma<sup>b</sup> and Wen-Hua Sun<sup>\*,b,c</sup>

(<sup>#</sup>Jiaoyan Li, Yingmiao Ma and Zheng Wang made an equal contribution in this work.)

<sup>a</sup> College of Chemistry and Material Science, Hebei Normal University, Shijiazhuang 050024, China

<sup>b</sup> Key Laboratory of Engineering Plastics and Beijing National Laboratory for Molecular Science, Institute of Chemistry, Chinese Academy of Sciences, Beijing 100190, China

<sup>c</sup> CAS Research/Education Center for Excellence in Molecular Sciences, University of Chinese Academy of Sciences, Beijing 100049, China

<sup>d</sup> Department of Chemistry, University of Leicester, University Road, Leicester LE1 7RH, UK.

\*E-mail: qbinliu@sina.com (Q. L.); whsun@iccas.ac.cn (W.-H.S); gas8@leicester.ac.uk (G.A.S.).

Tel: +86-10-62557955

#### **Contents**

|     |                                                                               |     |
|-----|-------------------------------------------------------------------------------|-----|
| 1.  | General Considerations                                                        | S1  |
| 2.  | NMR spectra                                                                   | S1  |
| 2.1 | NMR spectra for 5,6,7,8-tetrahydroquinolin-8-amine                            | S1  |
| 2.2 | NMR spectra for E and F                                                       | S2  |
| 2.3 | NMR spectra showing deactivation of catalyst E over time                      | S6  |
| 2.4 | NMR spectra of triphenylphosphine oxide isolated during catalyst deactivation | S6  |
| 2.5 | NMR spectra of <i>tert</i> -butyl-4-hydroxypiperidine-1-carboxylate           | S8  |
| 3.  | X-Ray crystallographic studies                                                | S9  |
| 4   | References                                                                    | S10 |

## 1. General Considerations

All manipulations involving ruthenium complexes, unless stated otherwise, were carried out under a nitrogen atmosphere using standard Schlenk techniques. 2-Propanol (analytical reagent) was either used directly from the bottle or was dried over sodium wire, distilled and stored under nitrogen before being degassed prior to use.  $^1\text{H}$  NMR (500 MHz),  $^{13}\text{C}$  NMR (125 MHz) and  $^{31}\text{P}$  (202 MHz) spectra were recorded on a Bruker AVIII-500 NMR spectrometer. GC measurements, with dodecane as an internal standard with respect to the ketone.<sup>1-3</sup> GC analysis was carried out on an Agilent 6820 instrument using a polar capillary column (part number 19091N-113 HP-INNOWAX): injector temp. 300 °C; detector temp. 300 °C; column temp. 40 °C; withdraw time 2 min, then 20 °C/min to 270 °C over 20 min.

## 2. NMR spectra

### 2.1 NMR spectra of 5,6,7,8-tetrahydroquinolin-8-amine

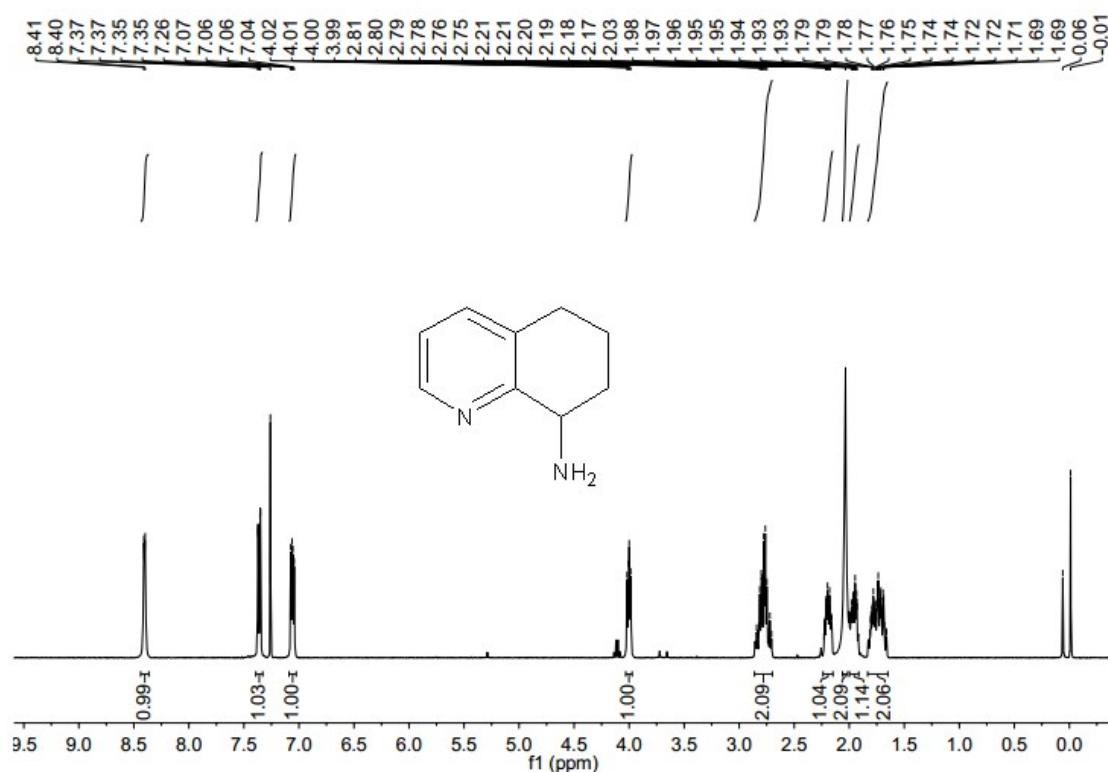

Figure S1  $^1\text{H}$  NMR spectrum of 5,6,7,8-tetrahydroquinolin-8-amine<sup>4</sup> in  $\text{CDCl}_3$

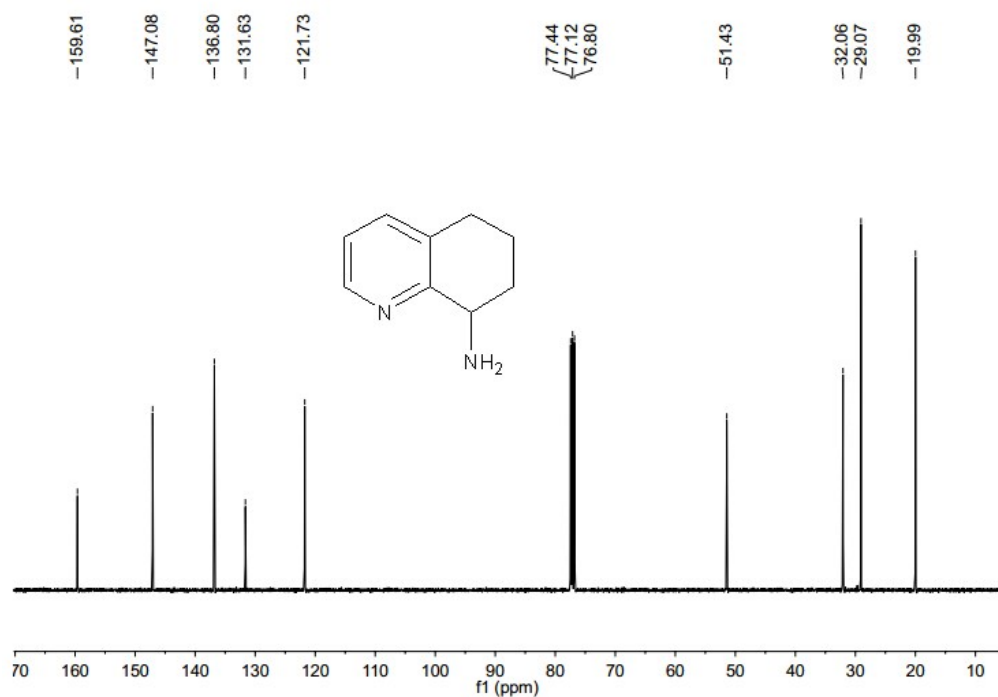

**Figure S2**  $^{13}\text{C}\{^1\text{H}\}$  NMR spectrum of 5,6,7,8-tetrahydroquinolin-8-amine in CDCl<sub>3</sub>

## 2.2 NMR spectra for E and F

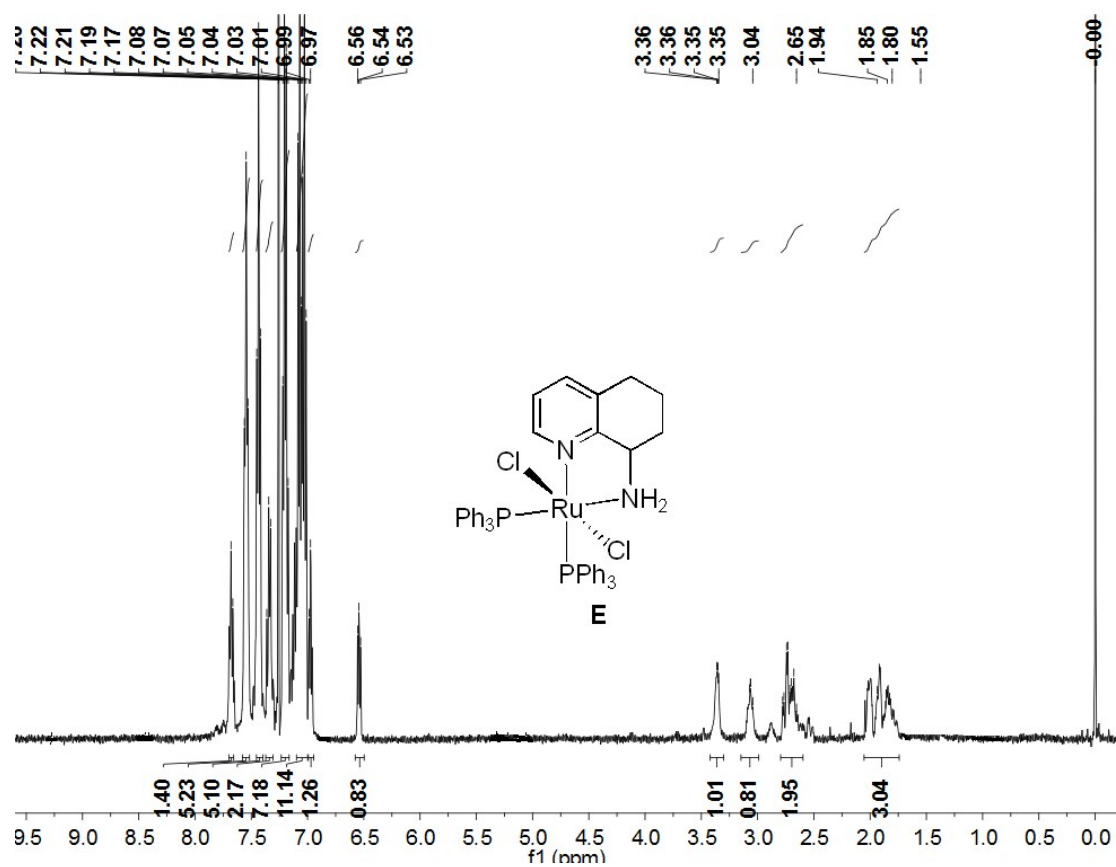

**Figure S3**  $^1\text{H}$  NMR spectrum of **E** in CDCl<sub>3</sub>

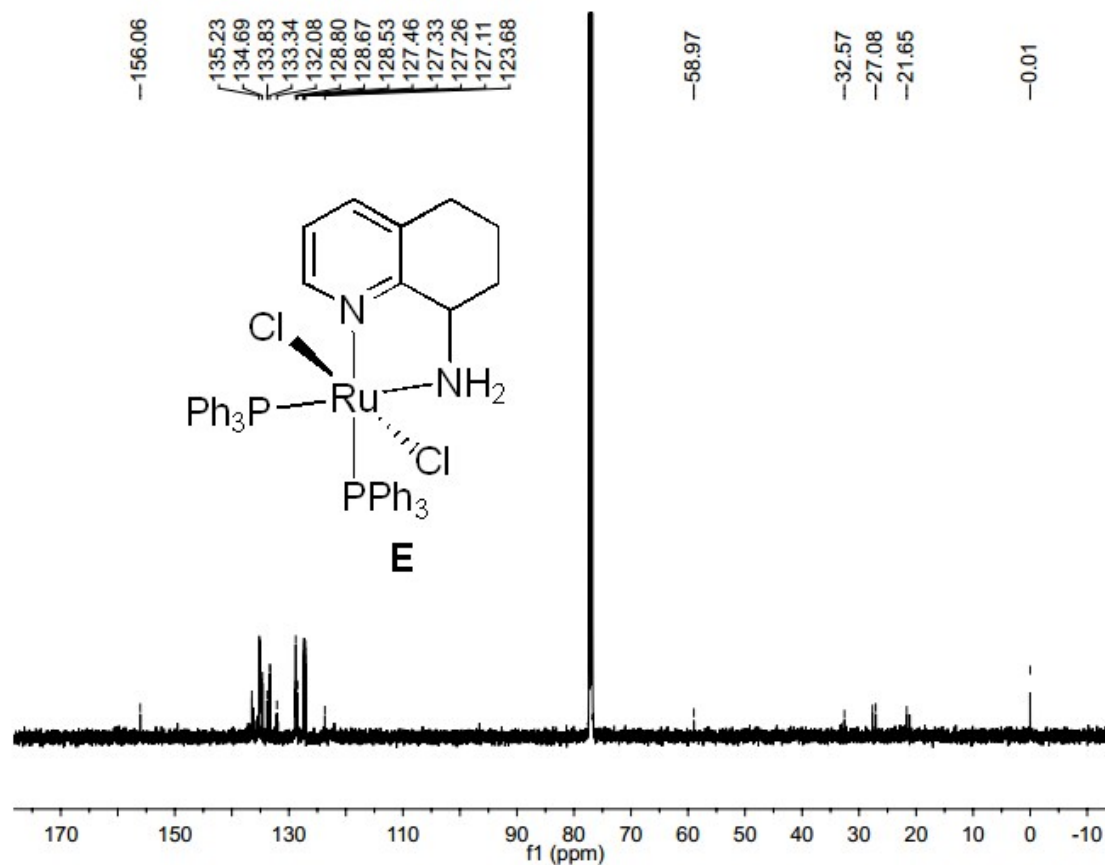

**Figure S4**  $^{13}\text{C}\{^1\text{H}\}$  NMR spectrum of **E** in  $\text{CDCl}_3$

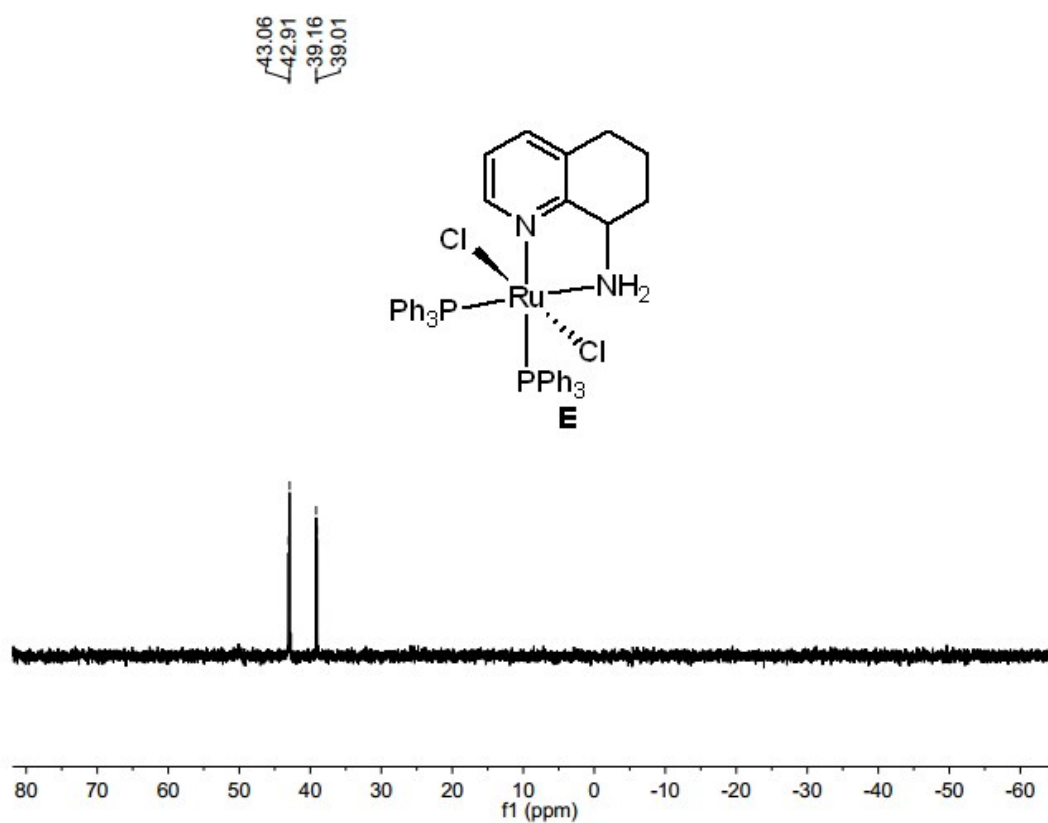

**Figure S5**  $^{31}\text{P}\{^1\text{H}\}$  NMR spectrum of **E** in  $\text{CDCl}_3$

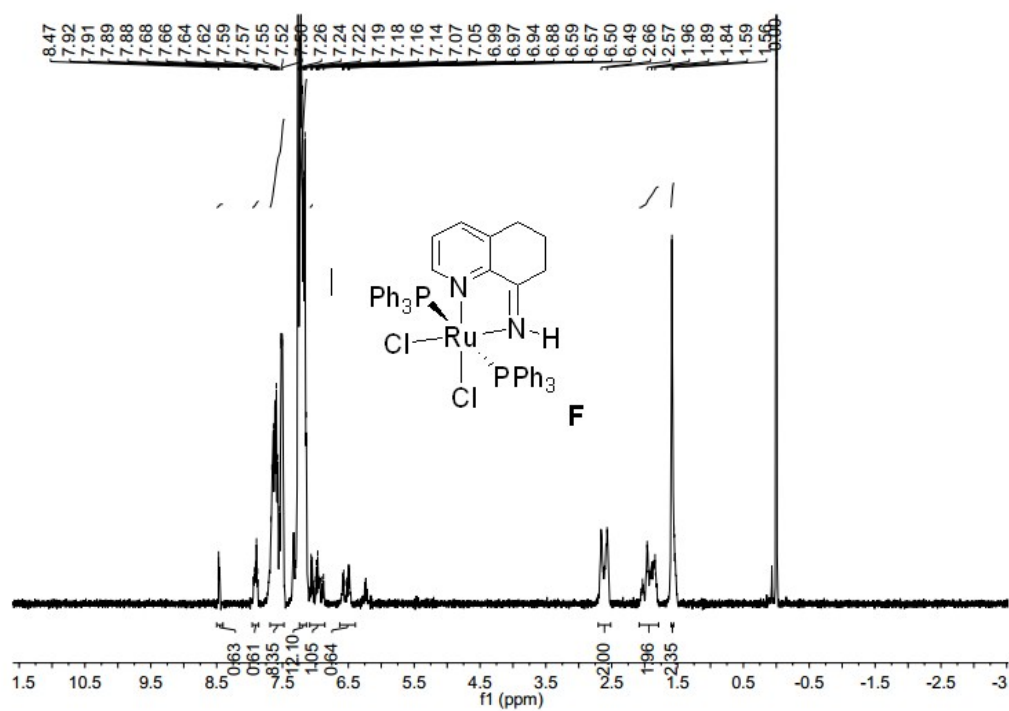

**Figure S6** <sup>1</sup>H NMR spectrum of **F** in CDCl<sub>3</sub>

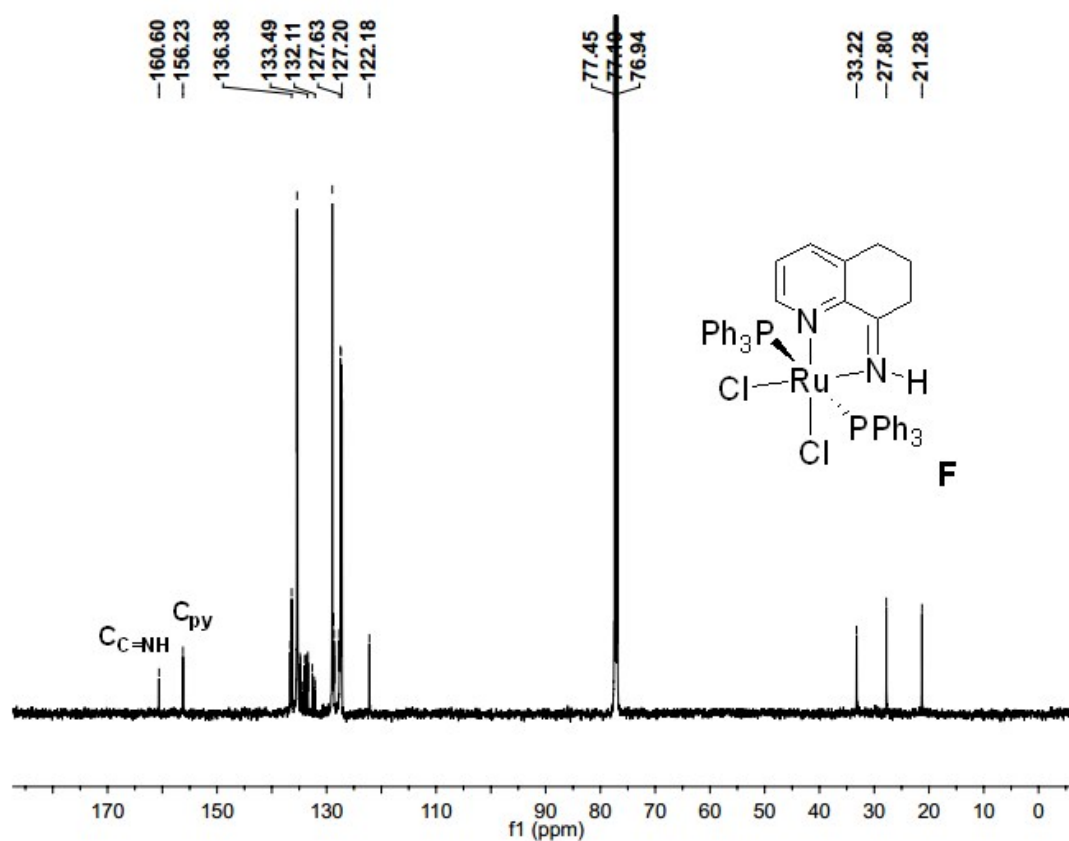

**Figure S7** <sup>13</sup>C{<sup>1</sup>H} NMR spectrum of **F** in CDCl<sub>3</sub>

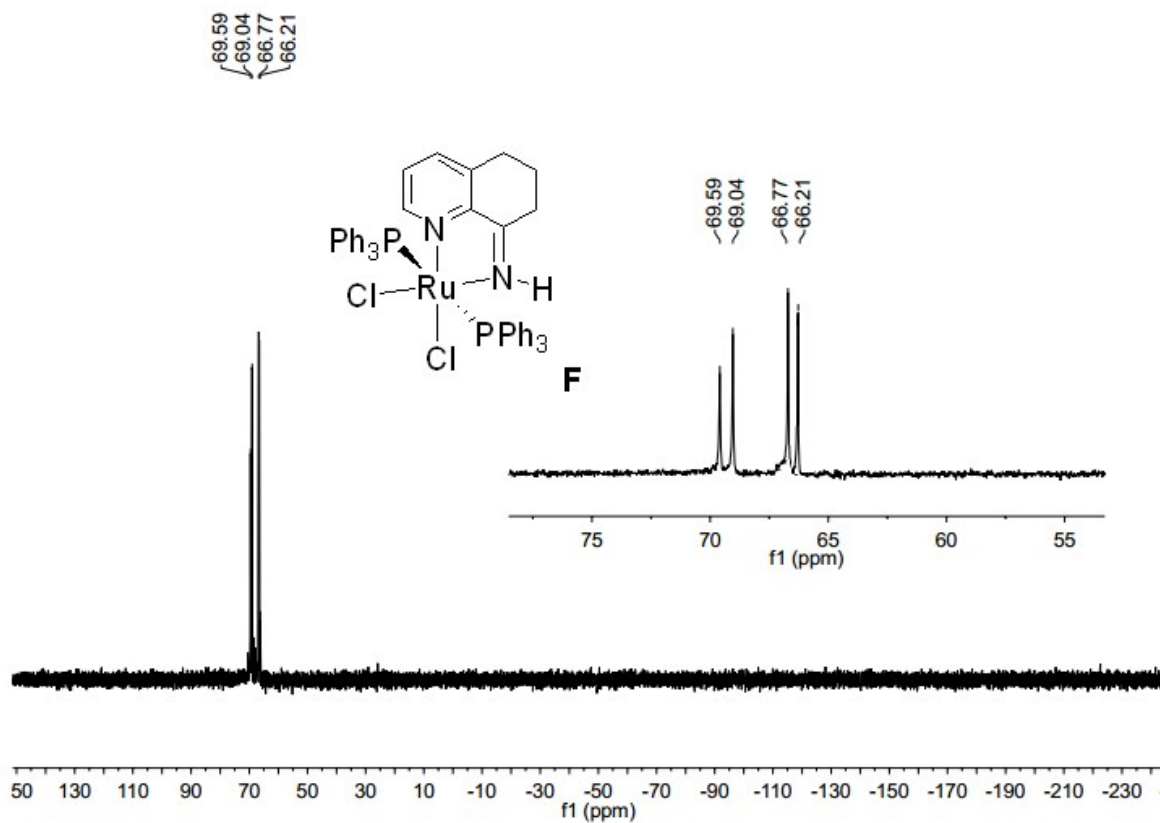

**Figure S8**  $^{31}\text{P}\{^1\text{H}\}$  NMR spectrum of **F** in  $\text{CDCl}_3$

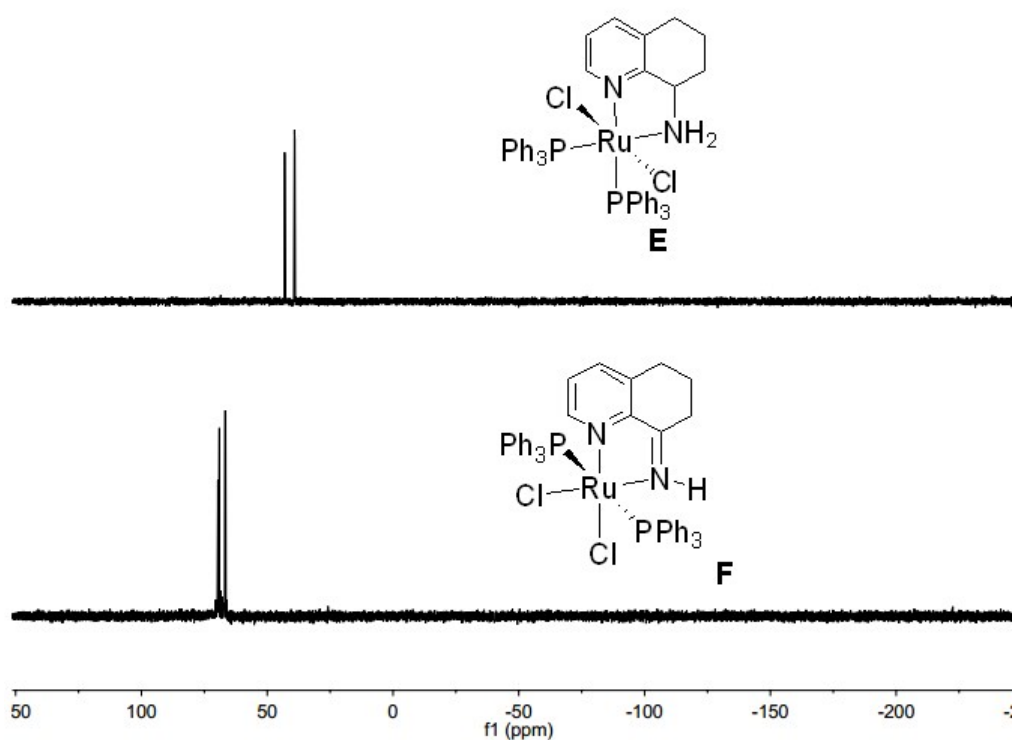

**Figure S9**  $^{31}\text{P}\{^1\text{H}\}$  NMR spectrum of **E** in  $\text{CDCl}_3$  (top) and after heating this solution to  $100\text{ }^\circ\text{C}$  for 1 hour to give **F** (bottom)

### 2.3 NMR spectra showing deactivation of catalyst E over time

Method: Under an oxygen atmosphere, a mixture of **E** (40 mg), *t*-BuOK (8 mg) and 2-propanol (5 mL) were stirred at 82 °C. Aliquots of the reaction mixture were taken at 1 min, 5 min, 15 min, and 30 min and their  $^{31}\text{P}$  NMR spectra immediately recorded.

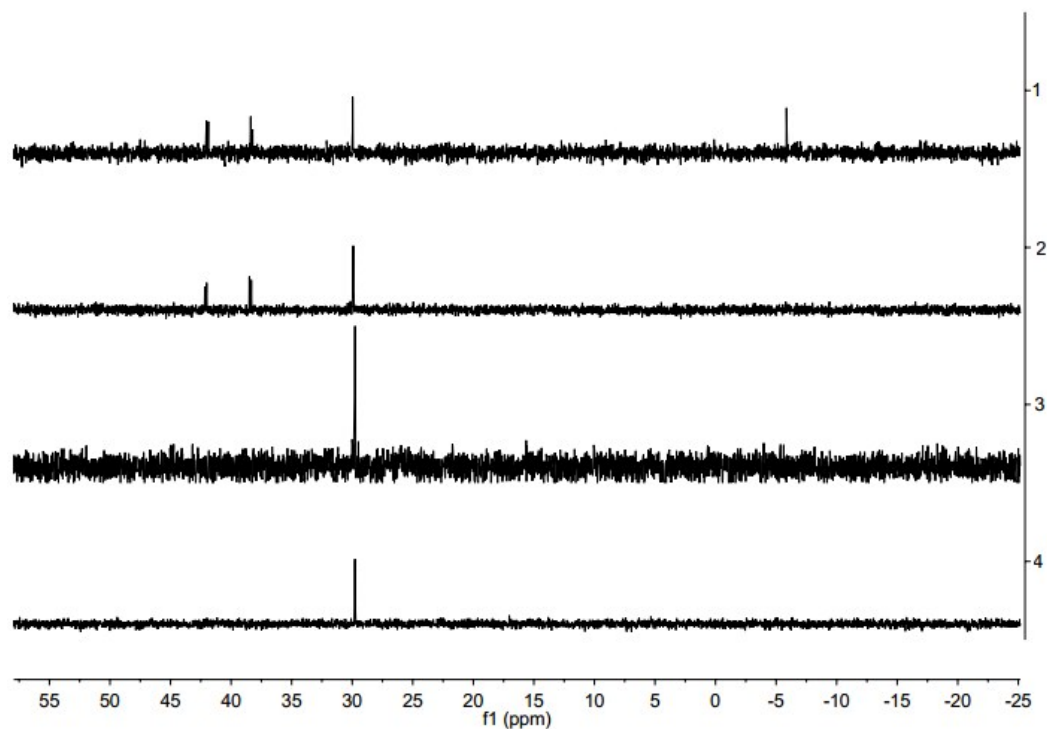

**Figure S10** Stacked  $^{31}\text{P}\{^1\text{H}\}$  NMR spectra of a sample of **E** that had been heated to 82 °C under an  $\text{O}_2$  atmosphere. Spectra recorded after 1 min (1), 5 min (2), 10 min (3) and 30 min (4)) showing catalyst deactivation of **E** and formation of  $\text{Ph}_3\text{PO}$ .

## 2.4 NMR spectra of triphenylphosphine oxide isolated during catalyst deactivation

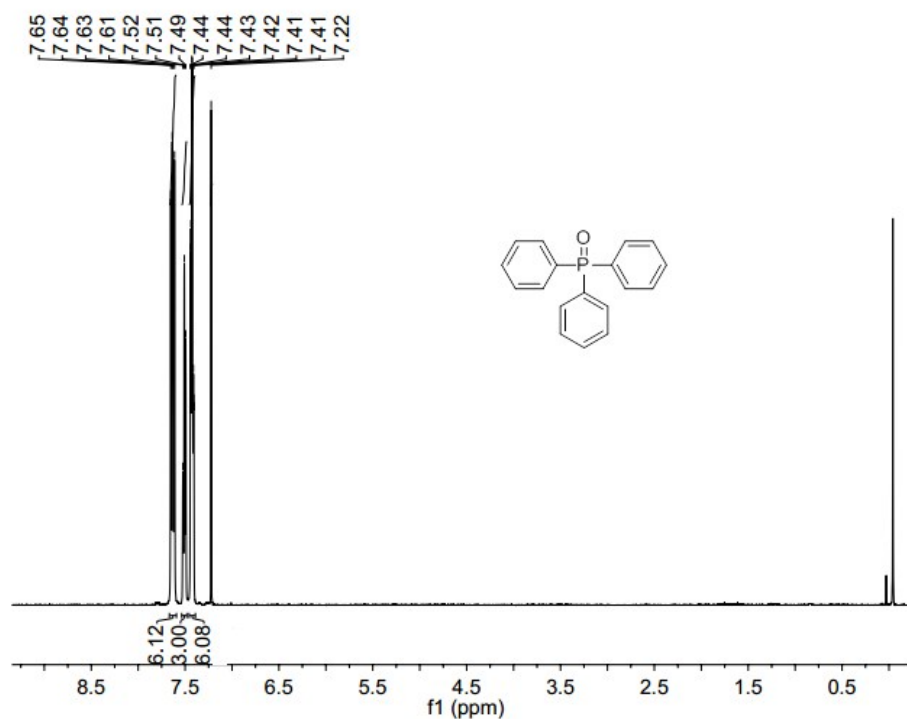

Figure S11 <sup>1</sup>H NMR spectrum of triphenylphosphine oxide<sup>4</sup> isolated during catalyst deactivation

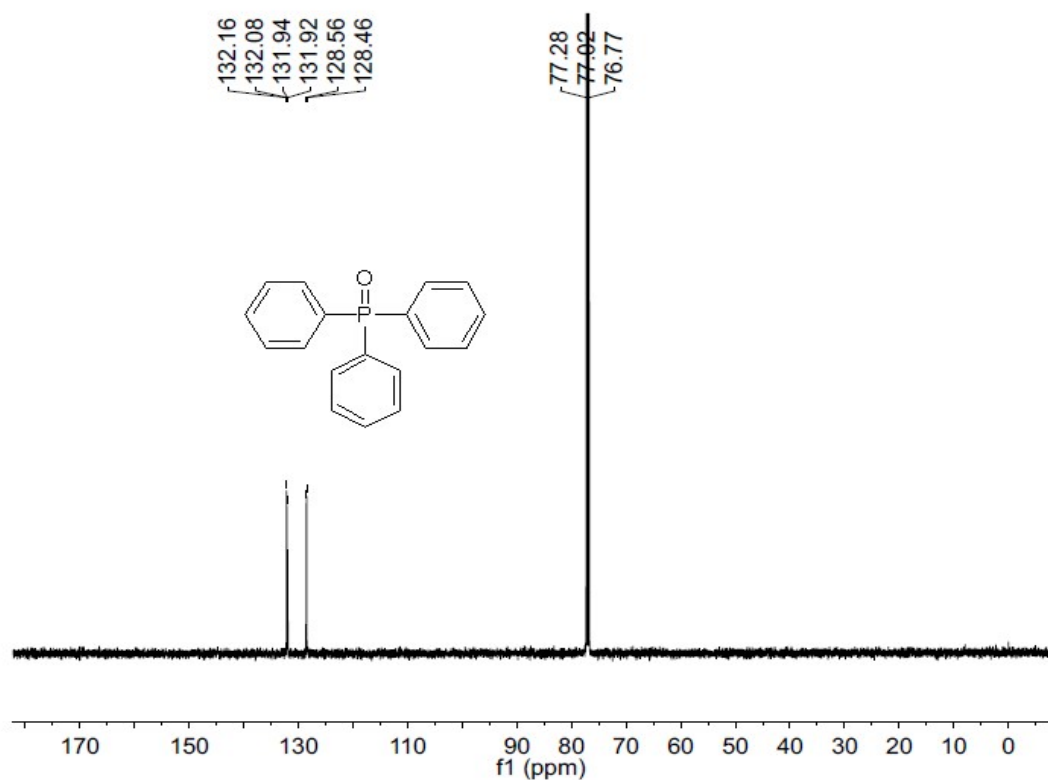

Figure S12 <sup>13</sup>C{<sup>1</sup>H} NMR spectrum of triphenylphosphine oxide<sup>4</sup> isolated during catalyst deactivation



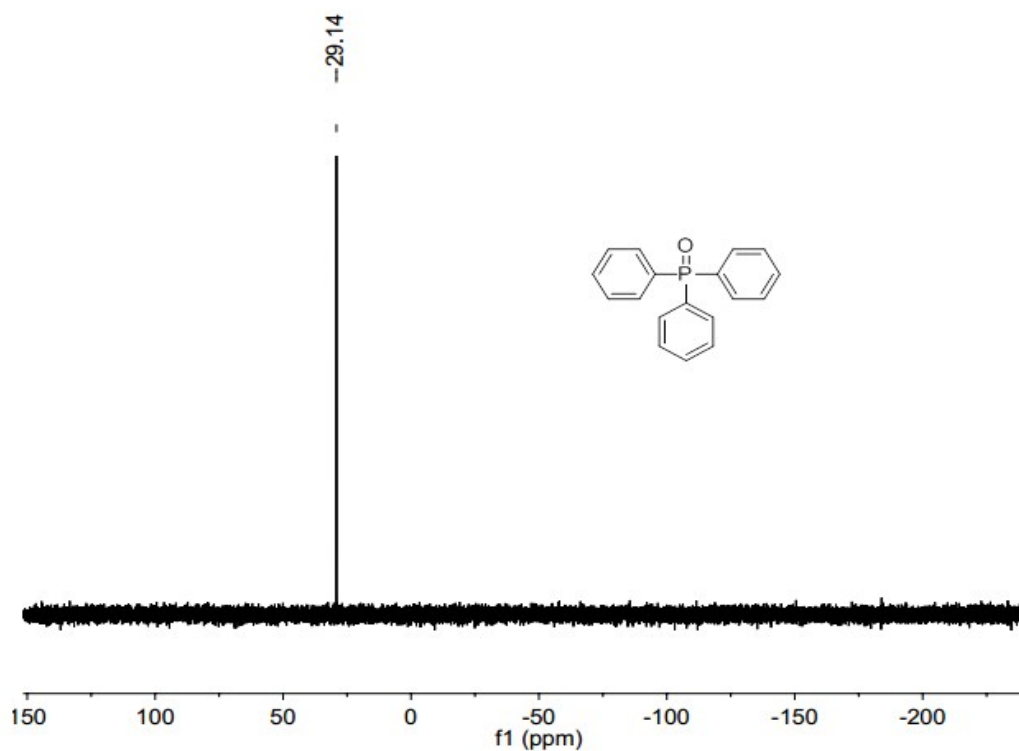

**Figure S13**  $^{31}\text{P}\{^1\text{H}\}$  NMR spectrum of triphenylphosphine oxide<sup>4</sup> isolated during catalyst deactivation

#### 2.4 NMR spectra of *tert*-butyl-4-hydroxypiperidine-1-carboxylate<sup>5</sup>

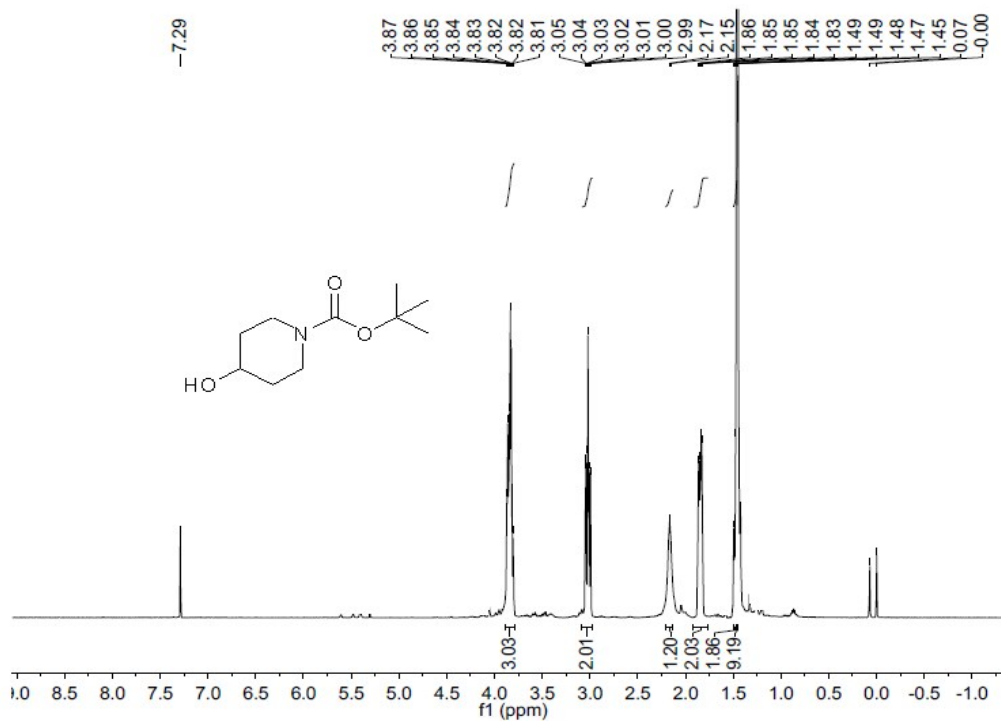

**Figure S14**  $^1\text{H}$  NMR spectrum of *tert*-butyl-4-hydroxypiperidine-1-carboxylate<sup>5</sup> in  $\text{CDCl}_3$  (entry 17, Table 5)

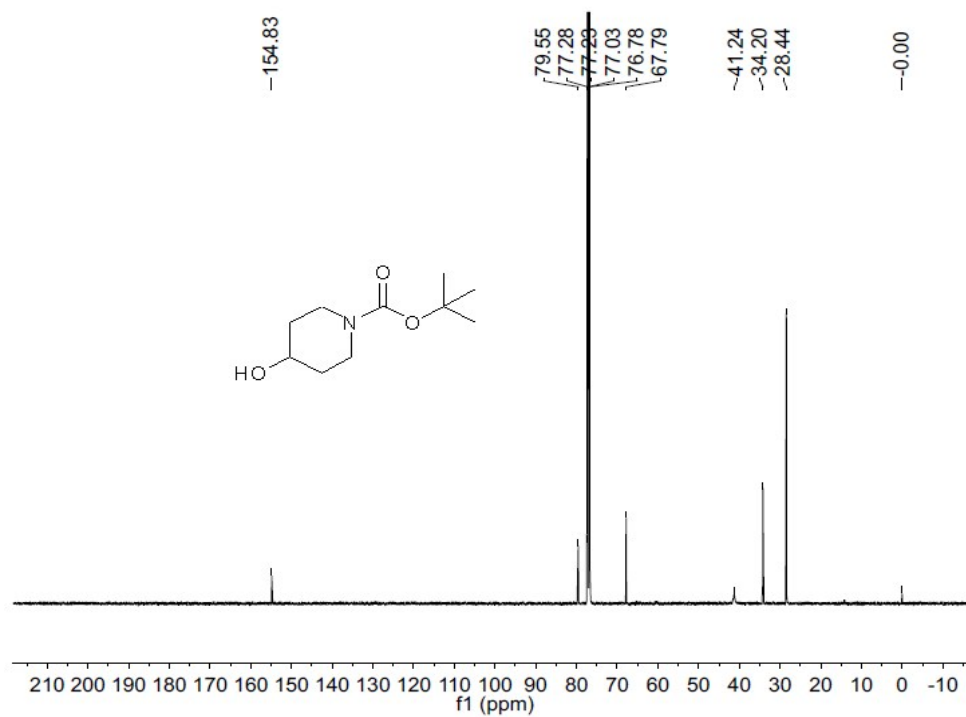

**Figure S15** <sup>13</sup>C NMR spectrum of *tert*-butyl-4-hydroxypiperidine-1-carboxylate<sup>5</sup> in CDCl<sub>3</sub> (entry 17, Table 5)

### 3. X-Ray crystallographic studies

**Table S1.** Crystal data and structure refinement for **E** and **F**

| Complex                                     | <b>E</b>                                                                         | <b>F</b>                                                                         |
|---------------------------------------------|----------------------------------------------------------------------------------|----------------------------------------------------------------------------------|
| Empirical formula                           | C <sub>45</sub> H <sub>42</sub> Cl <sub>2</sub> N <sub>2</sub> P <sub>2</sub> Ru | C <sub>45</sub> H <sub>40</sub> Cl <sub>2</sub> N <sub>2</sub> P <sub>2</sub> Ru |
| Formula weight                              | 844.72                                                                           | 842.75                                                                           |
| Temperature/K                               | 173.1500                                                                         | 173.1500                                                                         |
| Crystal system                              | monoclinic                                                                       | orthorhombic                                                                     |
| Space group                                 | P2 <sub>1</sub> /c                                                               | Pna2 <sub>1</sub>                                                                |
| a/Å                                         | 12.296(3)                                                                        | 25.282(5)                                                                        |
| b/Å                                         | 10.957(2)                                                                        | 9.6695(19)                                                                       |
| c/Å                                         | 33.036(7)                                                                        | 15.833(3)                                                                        |
| $\alpha$ /°                                 | 90.00                                                                            | 90.00                                                                            |
| $\beta$ /°                                  | 97.24(3)                                                                         | 90.00                                                                            |
| $\gamma$ /°                                 | 90.00                                                                            | 90.00                                                                            |
| Volume/Å <sup>3</sup>                       | 4415.4(15)                                                                       | 3870.9(13)                                                                       |
| Z                                           | 4                                                                                | 4                                                                                |
| $\rho$ calcg/cm <sup>3</sup>                | 1.271                                                                            | 1.444                                                                            |
| $\mu$ /mm <sup>-1</sup>                     | 0.580                                                                            | 0.661                                                                            |
| F(000)                                      | 1736.0                                                                           | 1724.0                                                                           |
| Crystal size/mm <sup>3</sup>                | 0.303 × 0.159 × 0.082                                                            | 0.327 × 0.276 × 0.081                                                            |
| Radiation                                   | MoK $\alpha$ ( $\lambda$ = 0.71073)                                              | MoK $\alpha$ ( $\lambda$ = 0.71073)                                              |
| 2 $\Theta$ range for data collection/°      | 2.48 to 54.98                                                                    | 4.5 to 54.98                                                                     |
| Index ranges                                | -15 ≤ h ≤ 15,                                                                    | -32 ≤ h ≤ 32,                                                                    |
|                                             | -14 ≤ k ≤ 14,                                                                    | -12 ≤ k ≤ 12,                                                                    |
|                                             | -42 ≤ l ≤ 42                                                                     | -20 ≤ l ≤ 20                                                                     |
| Reflections collected                       | 46059                                                                            | 43776                                                                            |
| Independent reflections                     | 10099 [R <sub>int</sub> = 0.1138, R <sub>sigma</sub> = 0.0840]                   | 8873 [R <sub>int</sub> = 0.0522, R <sub>sigma</sub> = 0.0309]                    |
| Data/restraints/parameters                  | 10099/0/469                                                                      | 8873/1/470                                                                       |
| Goodness-of-fit on F2                       | 1.125                                                                            | 1.054                                                                            |
| Final R indexes [I ≥ 2 $\sigma$ (I)]        | R <sub>1</sub> = 0.0962, wR <sub>2</sub> = 0.2214                                | R <sub>1</sub> = 0.0352, wR <sub>2</sub> = 0.0859                                |
| Final R indexes [all data]                  | R <sub>1</sub> = 0.1128, wR <sub>2</sub> = 0.2319                                | R <sub>1</sub> = 0.0368, wR <sub>2</sub> = 0.0867                                |
| Largest diff. peak/hole / e Å <sup>-3</sup> | 2.20/-1.13                                                                       | 0.93/-0.68                                                                       |

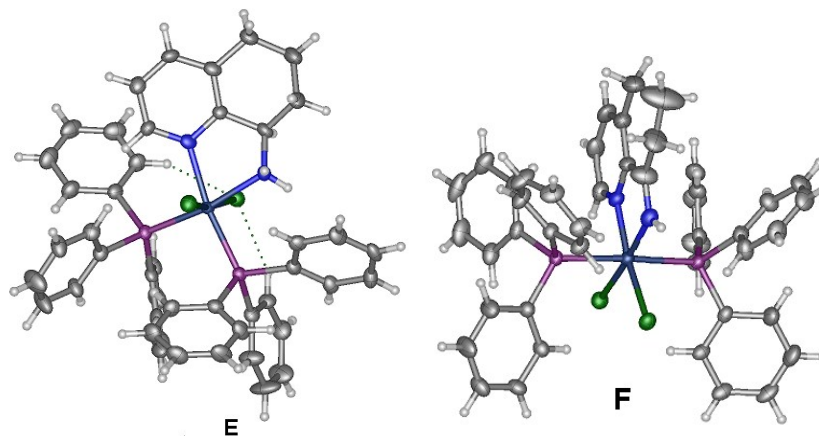

**Figure S16** Olex2 representations of **E** and **F**. Thermal ellipsoids are shown at 30% probability.

#### 4. References

- (1) (a) Wang, Z.; Pan, B.; Liu, Q.; Yue, E.; Solan, G. A.; Ma, Y.; Sun, W.-H. *Catal. Sci. Technol.* **2017**, 7, 1654-1661; (b) S. Muthaiahb, S. H. Honga, *Adv. Synth. Catal.* **2012**, 354, 3045; (c) S. Shahane, C. Fischmeister, C. Bruneau, *Catal. Sci. Technol.* **2012**, 2, 1425.
- (2) McEachern, E. J.; Bridger, G. J.; Skupinska, K. A.; Skerlj, R. T.; Yang, W. Pat., US20070060757A1, **2007**, p16.
- (3) (a) Baratta, W.; Ballico, M.; Del Zotto, A.; Herdtweck, E.; Rigo, P. *Organometallics* **2007**, 26, 5636-5642; (b) Baratta, W.; Herdtweck, E.; Siega, K.; Toniutti, M.; Rigo, P. *Organometallics* **2005**, 24, 1660-1669.
- (4) Mishra, V. S.; Vijaykumar, V.; Joshi, J. B. *Ind Eng Chem Res*, **1995**, 34(1): 2- 48.
- (5) Wang, J.; Liang, Y. -L.; Qu, J. *Chem. Commun.*, **2009**, 5144-5146.
